# Supplementary material
Source: publisher figshare collection journal article supplement (https://tandf.figshare.com/articles/dataset/_/1396275)
Supplement: Supplementary file 1 [file 3]

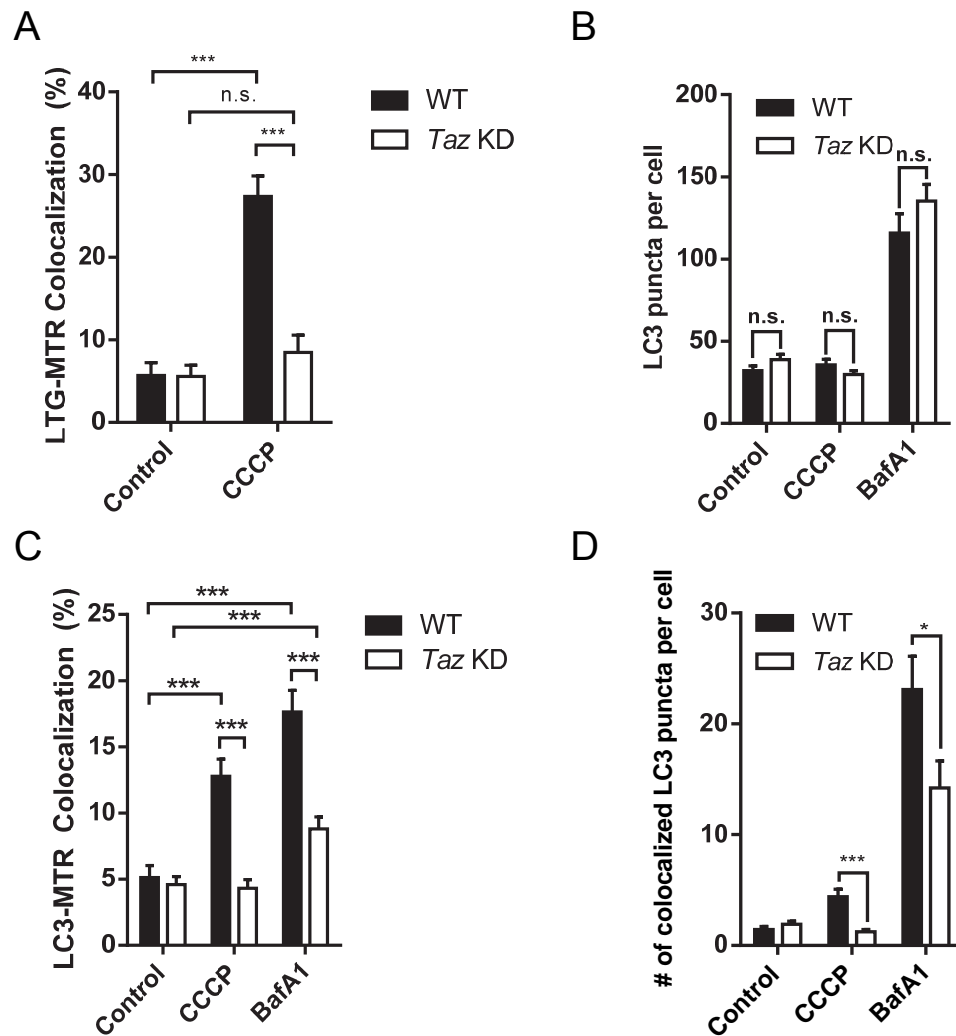

**Figure S1.** Quantitative measurements of confocal analysis of mitophagy. **(A)** Quantitative analysis of colocalization of mitochondria (MitoTracker Red, MTR) and lysosomes (LysoTracker Green, LTG) of the data presented Figure 1,  $n > 50$ . **(B)** Quantitative analysis of LC3 puncta number per cell of the data presented in Figure 3. **(C, D)** Quantitative analysis of colocalization of GFP-LC3 puncta and mitochondria (MTR) of the data presented in Figure 3. Quantification was carried out using ImageJ, and presented as mean  $\pm$  SEM,  $n > 39$ . \*  $P < 0.05$ , \*\*  $P < 0.01$ , \*\*\*  $P < 0.001$ , n.s. - not significant.

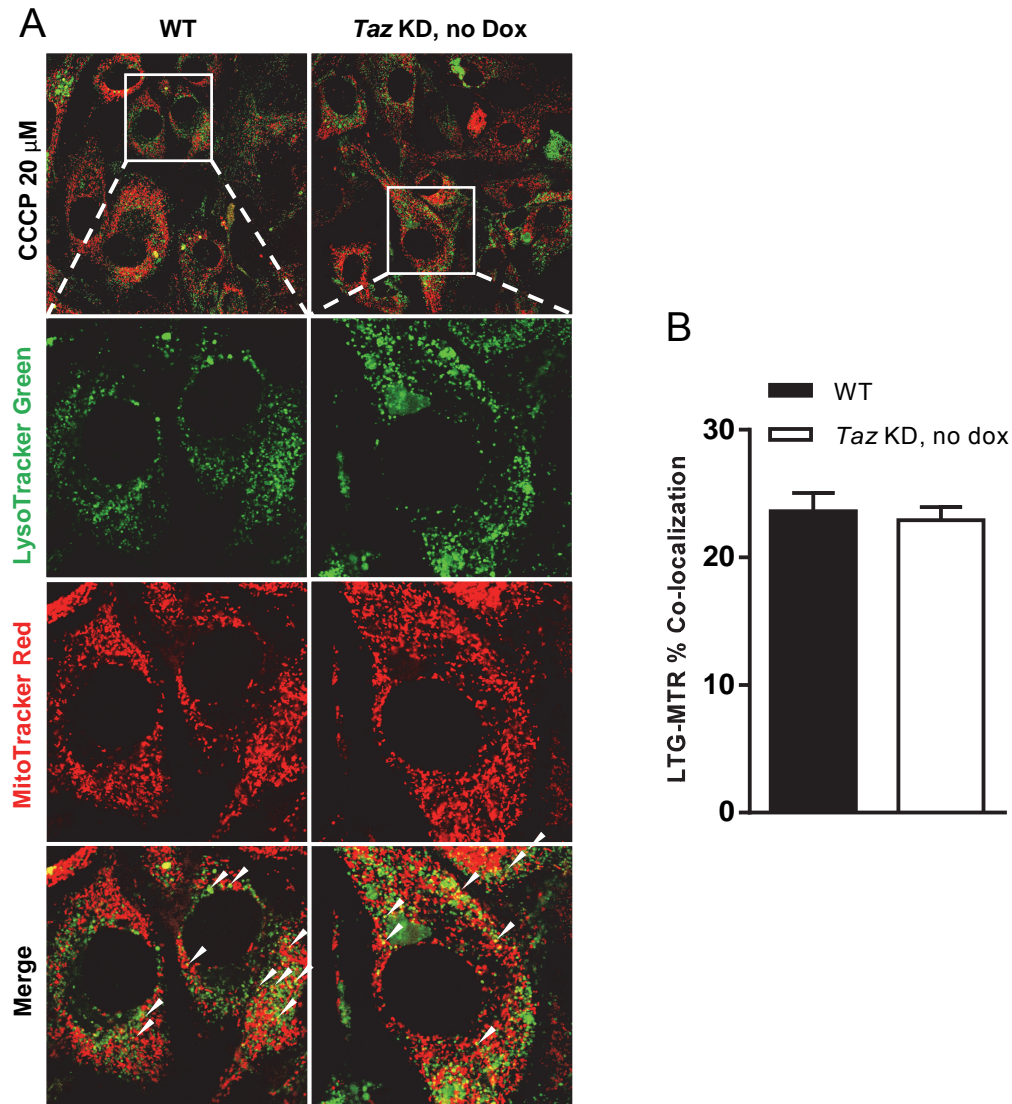

**Figure S2.** WT and uninduced *Taz* KD MEFs show no difference in CCCP-induced mitophagy. **(A)** Representative confocal images of wild-type (WT) and uninduced *Taz* KD (*Taz* KD, no dox) MEFs treated with MitoTracker Red, LysoTracker Green, and CCCP (20  $\mu$ M). **(B)** Quantification of MitoTracker Red (MTR) and LysoTracker Green (LTG) was carried out using ImageJ, and presented as mean  $\pm$  SEM,  $n = 15$  per group.

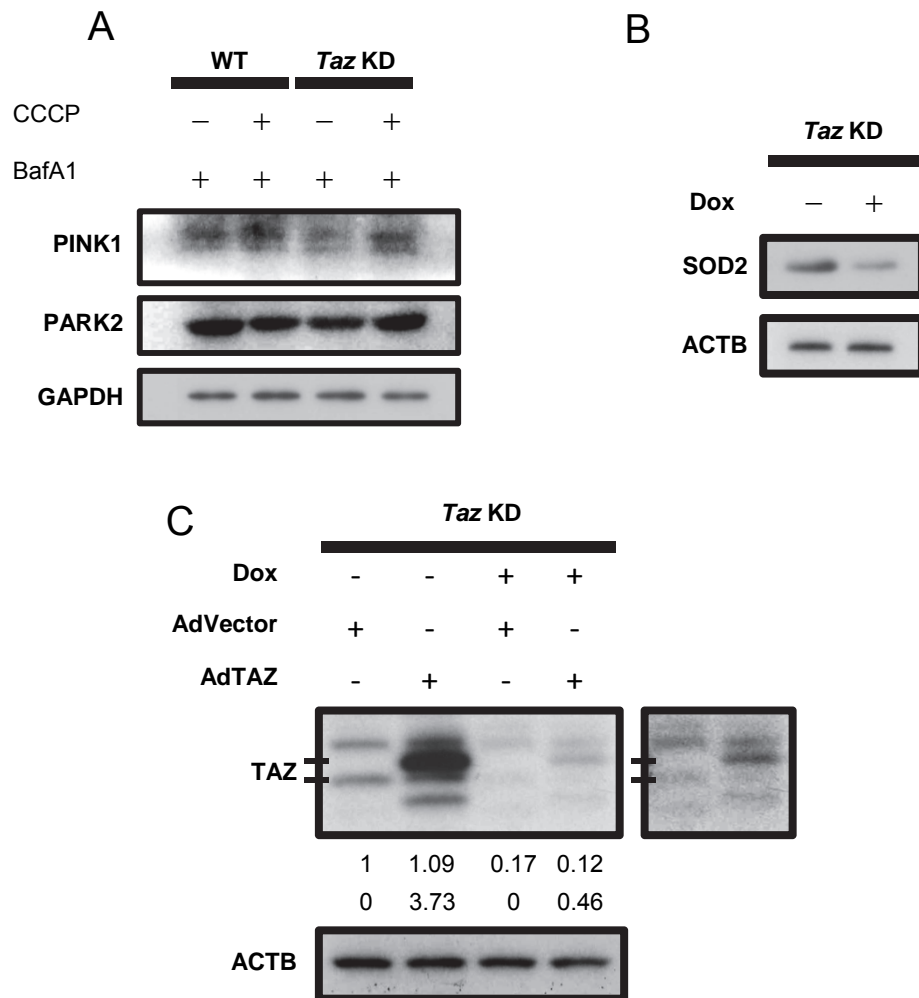

**Figure S3.** Western blot analyses of *Taz* KD MEFs. **(A)** Western blot analysis of PINK1 and PARK2 levels in WT and *Taz* KD MEFs. Cells were treated with 100 nM BafA1, and 20  $\mu$ M CCCP for 2 h. **(B)** Western blot analysis of SOD2 (superoxide dismutase 2, mitochondrial) in MEFs using ACTB as loading control. **(C)** Adenoviral rescue of TAZ-depleted cells. *Taz* KD MEFs were treated with doxycycline (Dox), and transfected with vector adenovirus (AdVector) or one expressing transgenic Myc-tagged TAZ (AdTAZ). Relative amount of protein was quantified on unaltered blot using densitometry, and displayed below the western blot. The top row of values correspond to endogenous TAZ, while the bottom row of values correspond to exogenous Myc-TAZ. Right 2 lanes darkened to better visualize TAZ. ACTB was used as loading control.
